1 Elisabetta Versace<sup>1\*</sup>, Jana Schill<sup>1,2</sup>, Andrea Maria Nencini<sup>1</sup>, Giorgio Vallortigara<sup>1</sup>

2

### 3 **Naïve chicks prefer hollow objects**

4 <sup>1</sup> Center for Mind/Brain Sciences, University of Trento (Italy)

5 <sup>2</sup> Universität Osnabrück, Germany

6

7 \* Corresponding author: [elisabetta.versace@unitn.it](mailto:elisabetta.versace@unitn.it); Piazza della Manifattura 1, 38068

8 Rovereto (TN), Italy; + 39 0464 808658

9

#### 10 **Abstract**

11 Biological predispositions influence approach and avoid responses since the beginning of  
12 life. Neonates of species that require parental care (e.g. human babies and chicks of the  
13 domestic fowl) are attracted by stimuli associated with animate social partners, such as  
14 face-like configurations, biological motion and self-propulsion. The property of being  
15 filled is used as a cue of animacy by 8-month-old infants but it is not known whether this  
16 reflects the effect of previous experience. We use chicks of the domestic fowl (*Gallus*  
17 *gallus*) to investigate whether the property of being filled vs. hollow elicits spontaneous  
18 or learned preferences. To this aim we tested preferences of naïve and imprinted chicks  
19 for hollow and closed cylinders. Contrary to our expectations, we documented an  
20 unlearned attraction for hollow stimuli. The preference for hollow stimuli decreased  
21 when chicks were imprinted on filled stimuli but did not increase when chicks were  
22 imprinted on hollow stimuli, suggesting that this feature is not crucial to categorize the  
23 familiarity of imprinting objects. When chicks were imprinted on occluded stimuli that  
24 could be either filled or hollow, the preference for hollow stimuli emerged again,  
25 showing that imprinting does not disrupt the spontaneous preference for hollow objects.

26 Further experiments revealed that hollow objects were mainly attractive by means of  
27 depth cues such as darker innards, more than as places to hide or as objects with high  
28 contrast. Our findings point to predisposed preferences for hollow objects that might be  
29 unrelated to social behaviour.

30

### 31 **Keywords**

32 Predispositions, hollow, filled, innards, *Gallus gallus*, filial imprinting, chicks

33

### 34 **Introduction**

35 Sensory and cognitive predispositions influence approach and avoid responses since the  
36 beginning of life [1–3]. In different species we observe spontaneous preferences for specific  
37 colours [4–7], shapes and sizes [6,8,9], configurations [10], dynamics [11,12], and odours [13–16].  
38 In precocial species, individuals are mobile soon after birth, and can be tested when they have  
39 little if any experience, to investigate spontaneous preferences [3]. Soon after hatching, chicks  
40 of the domestic fowl (*Gallus gallus*), which is a nidifugal species, possess some spontaneous  
41 preferences to approach stimuli that are associated with animate social partners [17]. When  
42 given a choice between a stuffed hen and a stuffed scrambled hen, chicks prefer to approach  
43 the hen [18,19]. The same preference is consistent across different breeds [20]. Behavioural  
44 studies have found that this preference is driven by an unlearned attraction towards the face  
45 configuration contained in the stuffed hen [10,18]. Moreover, between the biological  
46 movement of a hen or a cat and the rigid motion of a hen rotated on its vertical axis, chicks  
47 prefer to approach the biologically moving object [11,21]; and between a self-propelled object  
48 and an object propelled by another one, naïve chicks prefer the self-propelled object [12].  
49 Overall, chicks prefer to approach objects which are endowed with more animate features  
50 [2,3,22].

51 Observations on infants [23] suggest that 3-year-old children have a representation of the  
52 insides of animate beings as more likely to be filled than those of inanimate objects. Studies on  
53 human infants [24] have shown that 8-month-old babies possess expectations about the  
54 biological properties of animate and agentive entities. In this study infants were more  
55 surprised to see that self-propelled and agentive objects were hollow than when there was no  
56 evidence that those objects were hollow. It is not clear though whether previous experience  
57 with animate entities with innards (e.g. the parents) had generated infants' expectations, or  
58 whether they arose spontaneously. We reasoned that chicks of the domestic fowl (*Gallus*  
59 *gallus*), which are spontaneously attracted by entities which show cues associated with  
60 animacy in the absence of previous experience [2,3], might be a convenient subject to identify  
61 whether the property of being filled/hollow triggers unlearned preferences.

62 To this aim we tested preferences of naïve chicks (**Experiment 1**) maintained in darkness  
63 (Experiment 1a) or exposed to light (Experiment 1b) for hollow and closed cylinders of the  
64 size and colour that elicit filial responses. Moreover, since chicks rapidly learn features of  
65 their social partners by mere exposure through filial imprinting [25,26], they are a valuable  
66 model to study the role of experience in modifying spontaneous preferences. To this aim we  
67 investigated how imprinting modified unlearned preferences for hollow and filled objects  
68 (**Experiment 2**) after imprinting on hollow objects (Experiment 2a), filled objects  
69 (Experiment 2b) and objects who could not be perceived hollow or filled because their sides  
70 were occluded (Experiment 2c).

71 Since we noticed an overall preference for hollow objects, we investigated whether this  
72 behaviour was elicited by a preference for the stimulus that could better hide the chick  
73 (chicks could enter the hollow stimulus). In **Experiment 3** we checked whether the  
74 preference for hollow stimuli was still present when the stimuli were too small to host and  
75 hide chicks. We tested both dark-reared chicks and chicks exposed to light that had never

76 seen the test stimuli or any other object of similar size, shape and colour. We observed a  
77 preference for hollow objects. In **Experiment 4** we checked whether the size of the hollow  
78 object was important in determining the preference for hollow objects comparing the  
79 preference for the large and the narrow hollow objects. In **Experiment 5** we checked whether  
80 the darker colour of the shadows present in the innards of hollow objects has a role in driving  
81 preferences for hollow stimuli by comparing preferences for filled objects with a white vs. a  
82 black stopper (Experiment 5a). Since chicks preferred the object with the black stopper, we  
83 tested whether the preference for a hollow stimulus was stronger or weaker than the  
84 preference for a black cap (Experiment 5b). The observed preference for the black cap  
85 stimulus could be explained both by brightness (chicks preferred lower brightness) and by  
86 contrast (chicks preferred greater contrast). To clarify the importance of contrast and  
87 brightness in determining the preference for hollow objects, in **Experiment 6** we used two-  
88 dimensional stimuli with different colour and identical contrast, i.e. a white disk on a black  
89 background vs. a black disk on a white background. If the preference of chicks for hollow vs.  
90 Filled and for Black vs. Hollow was driven by the darker colour (innards or cap), in this  
91 contrast chicks should have chosen the white disk on a black background. If the preference  
92 was driven by contrast, chicks were expected to have no preference. A preference for the  
93 black disk on a white background would be consistent with a preference for darker  
94 objects/innards, possibly a cue of depth.

95

## 96 **MATERIALS AND METHODS**

### 97 **Ethical note**

98 All applicable international, national, and/or institutional guidelines for the care and use of  
99 animals were followed. This study was approved by the ethical committee of the University of  
100 Trento (Organismo Preposto al Benessere degli Animali) prot. N. 14-2015 and was licensed by

101 the Ministero della Salute, authorization n. 1138/2015. The research adhered to the  
102 ASAB/ABS Guidelines for the Use of Animals in Research.

103

#### 104 **Subjects**

105 The subjects were 24-hour old chicks of the domestic fowl (*Gallus gallus*) of the Hybro strain  
106 (a local hybrid variety of the White Leghorn breed). This breed has been selected to be  
107 sexually dimorphic at the moment of hatching, and chicks can be easily sexed looking at their  
108 feathers. The eggs were obtained from a commercial hatchery (Agricola Berica, Montegalda,  
109 Italy), then incubated in complete darkness (as in other experiments on predispositions) at  
110 37.7 °C until hatching, with the same procedure used in other tests for spontaneous  
111 preferences in chicks [11,12,19]. Three days before hatching humidity was increased from  
112 40% to 60%. Eggs hatched in individual boxes (11 x 8.5 x 14 cm) and chicks could hear their  
113 conspecifics but had no visual or tactile contact with conspecifics until the moment of test.  
114 The exact number of chicks used in each experiment, divided by Sex and presence/absence of  
115 choice during the test, is presented in Table 1 (chicks that did not move from the central area  
116 were excluded from the analyses since did not show any preference).

117

| Experiment | Experience          | Test stimuli                  | Females | Males |
|------------|---------------------|-------------------------------|---------|-------|
| 1a         | Naïve: Dark-reared  | Hollow - Filled (large)       | 57      | 52    |
| 1b         | Naïve: Light-reared | Hollow - Filled (large)       | 27      | 26    |
| 2a         | Imprinted: Occluded | Hollow - Filled (large)       | 37      | 27    |
| 2b         | Imprinted: Filled   | Hollow - Filled (large)       | 59      | 64    |
| 2c         | Imprinted: Hollow   | Hollow - Filled (large)       | 57      | 67    |
| 3          | Naïve: Light-reared | Hollow - Filled (narrow)      | 17      | 14    |
| 4          | Naïve: Dark-reared  | Large - Narrow (hollow)       | 47      | 36    |
| 5a         | Naïve: Dark-reared  | White - Black (large filled)  | 11      | 16    |
| 5b         | Naïve: Light-reared | Hollow - Black filled (large) | 19      | 21    |
| 6          | Naïve: Dark-reared  | White disk - Black disk       | 19      | 17    |

118

119 **Test stimuli**

120 Test stimuli are shown in Figure 1. In Experiment 1 and 2 test stimuli were large plastic tubes  
121 (12 cm,  $\varnothing$  4 cm) left open (Hollow, Fig. 1A) or closed with a white cap (Filled, Fig. 1B), with an  
122 orange external surface and a white internal surface. In Experiment 3 we used the same  
123 stimuli with the only difference that the diameter was 2.5 cm (Narrow stimuli are shown in  
124 Fig. 1C and 1D). In Experiment 4 we used Large and Narrow hollow stimuli (Fig. 1A and 1C).  
125 In Experiment 5 we used stimuli similar to those used in Experiments 1 and 2 with the only  
126 difference that one cap was black (Fig. 1E). In Experiment 6 we used a white disk on a black  
127 background, and a black disk on a white background (Fig. 1F) with a diameter of 4 cm located  
128 at 4.5 cm from the ground.

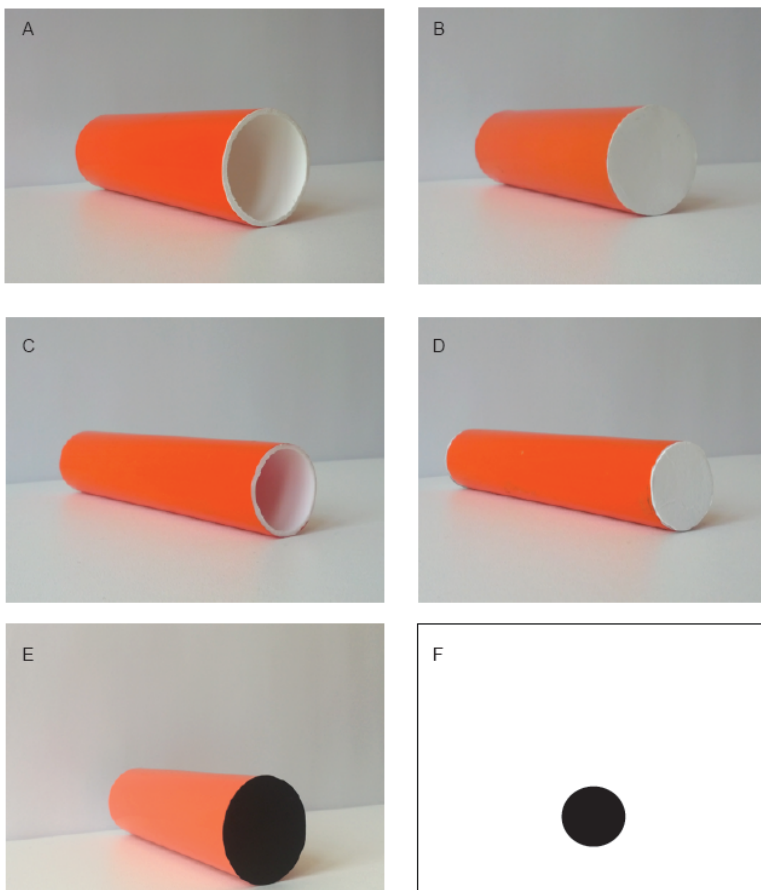

129  
130 Figure 1. Stimuli used in Experiment 1 and 2 (A and B), Experiment 3 (C and D), Experiment 4 (A and C),  
131 Experiment 5 (A and E), and Experiment 6 (Panel F shows the Black disk on the white background. The other  
132 stimulus was a White disk on a black background).

133 **Imprinting stimuli**

134 In experiment 2 chicks were individually imprinted to orange cylinders (12 cm,  $\varnothing$  4 cm), that  
135 were presented through a 7.5 x 10 cm transparent plastic window. Imprinting lasted  $24 \pm 3$   
136 and was immediately followed by the test. Chicks had no direct interaction with the stimulus  
137 during imprinting and the only interaction with conspecifics was auditory. In the Occluded  
138 condition the cylinder was presented horizontally and the chicks could not see whether it was  
139 hollow or filled because the edges were covered. In the Hollow and Filled condition the hollow  
140 and or filled cylinder were presented perpendicular to the transparent window and the chick  
141 could see whether it was hollow or not.

142

143 **Test apparatus**

144 The experiment took place in a 100 x 30 x 31 cm white arena open on the top (see Figure 2).  
145 Test stimuli were located in the middle of each short side on a white plastic platform that was  
146 4.5 cm high. The box was virtually divided into three areas: a left area (41 cm), a central area  
147 (18 cm) and a right area (41 cm). The white platforms occupied 15 cm in each side area. In  
148 Experiment 4, the platforms were removed and the stimuli were placed directly on the walls  
149 of the apparatus. The right-left position of the stimuli was counterbalance between subjects.

150

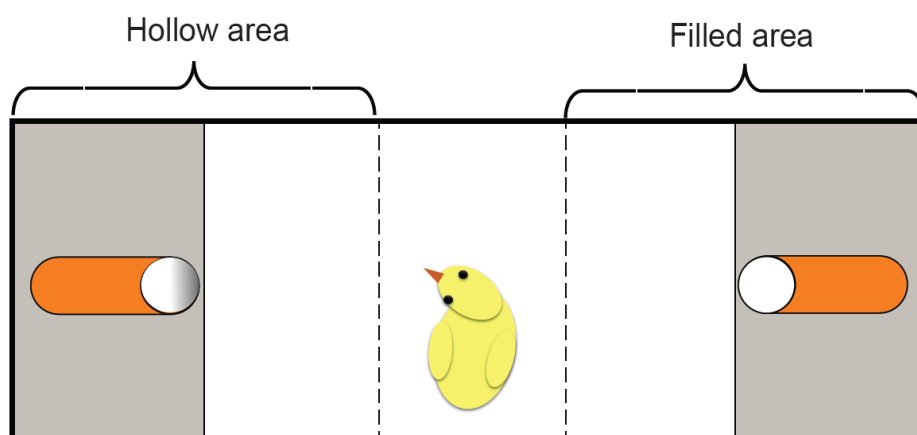

151 Figure 2. Illustration of the testing apparatus. The right/left position of the stimuli was counterbalanced between  
152 subjects.

153 **PROCEDURE**

154 **Imprinting**

155 Soon after hatching, in the imprinting experiments chicks were individually exposed to the  
156 imprinting stimulus for 24 hours before testing under constant light. Imprinting cages were  
157 28 x 38 x 32 cm and the stimulus was presented through a transparent partition (7.5 x 10 cm).

158 In this way chicks had no direct interaction with the stimuli before testing, similarly to naïve  
159 chicks that had never experienced stimuli like those used during the test.

160

161 **Test**

162 **Procedure and data analysis**

163 We followed the same procedure in all experiments. Each chick was individually located in the  
164 centre area facing the long side of the box opposite to the experimenter and video recorded  
165 for 360 seconds. We recorded which side area was entered first (First choice) and the seconds  
166 spent in each side area. The chick was considered to have entered a new sector as soon as it  
167 crossed the borderline with both feet. After the testing phase chicks were not used in any  
168 other experiment. For the chicks which entered side areas that indicate a choice we checked  
169 whether the first choice was significantly different from the 0.5 chance level using a Chi-  
170 squared test, with alpha = 0.05.

171 For each chick that left the central area we calculated an index of preference for the Hollow  
172 stimulus (Experiments 1, 2 and 3) or an index of preference for the Narrow (Experiment 4) or  
173 Black stimulus (5) in this way:

174 
$$\text{Hollow preference} = \frac{\text{seconds in the Hollow stimulus area}}{\text{seconds in the Hollow stimulus area} + \text{seconds in the Filled stimulus area}}$$

175

176 
$$\text{Narrow preference} = \frac{\text{seconds in the Narrow stimulus area}}{\text{seconds in the Narrow stimulus area} + \text{seconds in the Large stimulus area}}$$

177



178 
$$\text{Black preference} = \frac{\text{seconds in the Black stimulus area}}{\text{seconds in the Black stimulus area} + \text{seconds in the White stimulus area}}$$

179

180 For all indices, 1 indicates a full preference for the respective stimulus (Hollow, Narrow,  
181 Black), 0.5 no preference and 0 a full preference for the opposite stimulus (Filled, Large,  
182 White). Since all data had a bimodal distribution with peaks on the extremes (0 and 1) we  
183 used non-parametric statistics to test for significance: the Kruskal-Wallis test to test for  
184 differences between conditions and sexes, and the Mann-Whitney-Wilcoxon one-sample test  
185 vs. the 0.5 chance level.

186 Chicks that did not make any choice were excluded from the analyses on the preferences but  
187 we compared the chicks that made a choice between naïve and imprinting experiment to  
188 check for the effectiveness of the imprinting procedure: we expected a higher choice rate in  
189 imprinted chicks compared to naïve chicks.

190

## 191 **RESULTS**

### 192 **Experiment 1: naïve chicks (dark-reared and light-reared) chicks tested with Hollow vs.** 193 **Filled stimuli.**

194 We assessed the preference for the hollow/filled object in naïve chicks, namely dark-reared  
195 and light-reared chicks that had never experienced any of the test stimuli before the test.

196 **First choice.** There was no significant difference between dark- and light-reared chicks (Chi-  
197 square test:  $\chi = 0.073$ ,  $df = 1$ ,  $P = 0.79$ ), and in both conditions chicks had the same trend,  
198 therefore we collapsed the two naïve conditions for further analyses. The number of chicks  
199 that approached the Hollow vs. Filled stimulus was significantly different from chance (Chi-  
200 square test:  $\chi = 8.91$ ,  $df = 1$ ,  $P = 0.003$ ) with an overall preference for the Hollow stimulus  
201 (Figure 3A). Compared to dark-reared chicks, naïve chicks exposed to light or other

202 stimulation are known to exhibit stronger predisposed preferences [11,27], and we could use  
203 a smaller sample for light-reared chicks.

204

205 **Hollow preference.** Considering the Hollow preference index we did not observe any  
206 significant Sex difference (Kruskal-Wallis test:  $H = 0.32$ ,  $df = 1$ ,  $P = 0.57$ ) or Exposure (dark- vs.  
207 light-rearing) difference (Kruskal-Wallis test:  $H = 0.07$ ,  $df = 1$ ,  $P = 0.79$ ), therefore we  
208 collapsed the two naïve conditions for further analyses. We documented a significant  
209 preference for the Hollow stimulus (Mann-Whitney test:  $V = 8053$ ,  $df = 1$ ,  $P = 0.01$ ), see Figure  
210 3B.

211

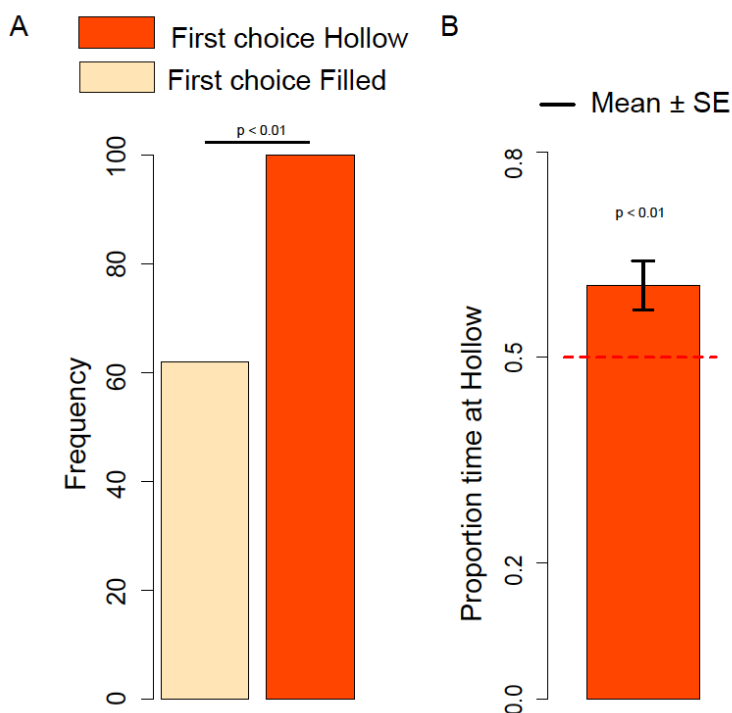

212

213 Figure 3. **A.** Number of naïve chicks that first approached the Hollow or Filled stimulus in the dark-reared and  
214 light-reared condition. **B.** Proportion of time spent at the Hollow stimulus by dark-reared and light-reared  
215 chicks.

216

217 **Experiment 2: chicks imprinted with Hollow, Filled or Occluded and tested with Hollow**  
218 **vs. Filled stimuli.**

219 To investigate the role of experience in determining the preferences for hollow objects we  
220 investigated the preference for the hollow/filled object in imprinted chicks, namely chicks  
221 that had been exposed to the filled or hollow object, or to an object located horizontally the  
222 sides of which were occluded, so that it did not show whether it was filled or hollow.

223 **First choice.** The number of chicks that approached the Hollow vs. Filled stimulus was  
224 significantly different between imprinting conditions (Chi-square test:  $\chi = 7.15$ ,  $df = 2$ ,  $P =$   
225  $0.028$ ). Chicks imprinted on the Occluded object showed a significant preference for the  
226 hollow object (Chi-square test:  $\chi = 7.56$ ,  $df = 1$ ,  $P = 0.006$ ), whereas chicks imprinted on the  
227 Filled (Chi-square test:  $\chi = 0.40$ ,  $df = 1$ ,  $P = 0.53$ ) and Hollow object (Chi-square test:  $\chi = 2.61$ ,  
228  $df = 1$ ,  $P = 0.11$ ) did not. While the first choice of chicks imprinted on the Occluded object did  
229 not differ from the first choice of chicks imprinted on the Hollow object (Chi-square test:  $\chi =$   
230  $1.35$ ,  $df = 1$ ,  $P = 0.24$ ), there was a significant difference between the first choice of chicks  
231 imprinted on the Occluded object and the first choice of chicks imprinted on the Filled object  
232 (Chi-square test:  $\chi = 6.02$ ,  $df = 1$ ,  $P = 0.014$ ). Only chicks imprinted on the Filled object had a  
233 tendency to choose the Filled object (Figure 4A). While running the experiments, we noticed a  
234 trend for a sex difference between hollow/filled imprinted chicks. In the light of the  
235 documented sex differences in the preference for the slight novelty of imprinting objects  
236 between male and female chicks [28,29], we decided to increase the sample in these  
237 conditions to clarify whether it was a spurious effect. After increasing the sample, the trend  
238 disappeared, but we ended up with a larger sample size for these two groups.

239

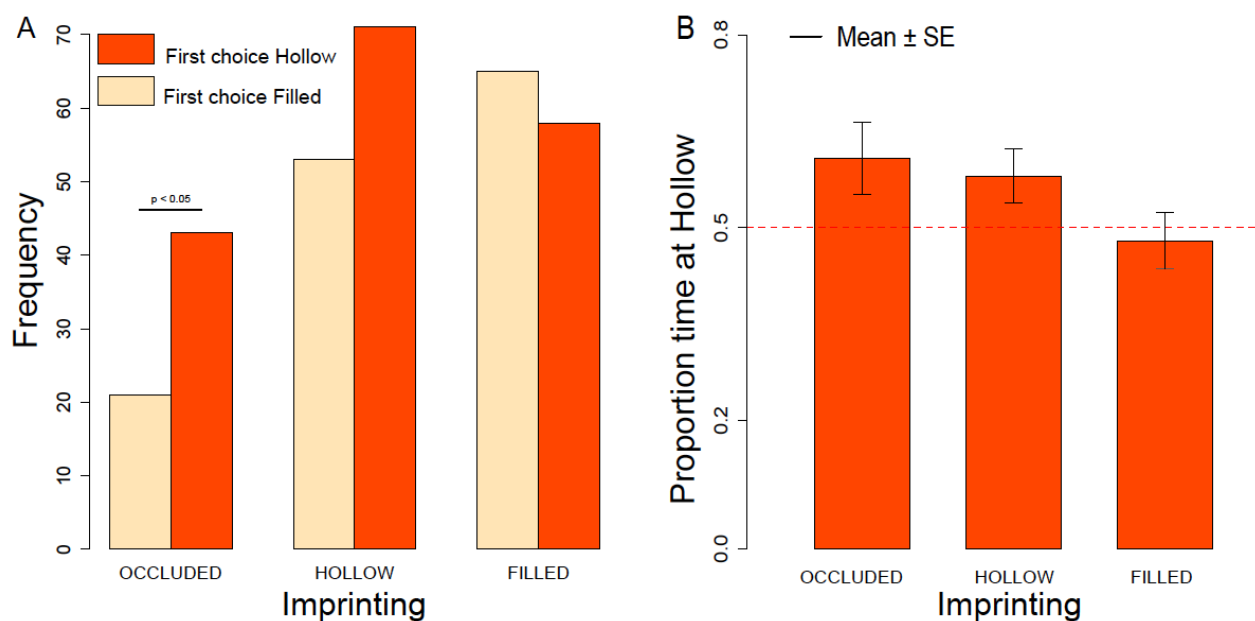

240

241 Figure 4. **A.** Number of imprinted chicks that first approached the Hollow or Filled stimulus after being exposed  
242 to Occluded, Hollow or Filled imprinting stimuli. **B.** Proportion of time spent at the Hollow stimulus for chicks  
243 exposed to Occluded, Hollow or Filled imprinting stimuli.

244

245 **Hollow preference.** Considering the Hollow preference index we did not observe any  
246 significant Sex difference (Kruskal-Wallis test:  $H = 1.60$ ,  $df = 1$ ,  $P = 0.21$ ) or Exposure  
247 difference (Kruskal-Wallis test:  $H = 3.66$ ,  $df = 2$ ,  $P = 0.161$ ). We observed an overall trend for  
248 preferring the Hollow stimulus (Mann-Whitney test:  $V = 27016.5$ ,  $df = 1$ ,  $P = 0.063$ ), that  
249 turned out highly significant when considering only the chicks never exposed to filled stimuli,  
250 namely chicks imprinted on the occluded and hollow objects (Mann-Whitney test:  $V =$   
251  $10721.5$ ,  $df = 1$ ,  $P = 0.009$ ), see Figure 4B.

252

### 253 **Experiment 3: naïve chicks tested with narrow Hollow vs. narrow Filled stimuli.**

254 To investigate the extent and consistency of the hollow preference, we tested the preference  
255 for the hollow/filled object in naïve chicks, using smaller stimuli than those used in  
256 Experiment 1.

257 **First choice.** Chicks confirmed the preference for hollow stimuli (Chi-square test:  $\chi = 17.06$ , df  
258 = 1,  $P < 0.001$ ).

259 **Hollow preference.** Considering the Hollow preference index we did not observe any  
260 significant Sex difference (Kruskal-Wallis test:  $H = 1.46$ , df = 1,  $P = 0.23$ ) but an overall  
261 preference for the Hollow stimulus (Mann-Whitney test:  $V = 461$ , df = 1,  $P < 0.001$ ).

262

#### 263 **Experiment 4: naïve chicks tested with Large hollow vs. Narrow hollow stimuli.**

264 To investigate whether the preference of young chicks for hollow objects was driven by the  
265 possibility to hide inside hollow objects, we presented naïve dark-reared chicks with a choice  
266 between Large (4 cm in diameter, large enough to hide a chick) and Narrow hollow stimuli  
267 (2.5 cm in diameter, too small to hide a chick).

268 **First choice.** The number of chicks that approached the Large vs. Narrow stimulus was not  
269 significantly different between Sexes (Chi-square test:  $\chi = 0.14$ , df = 1,  $P = 0.71$ ), therefore we  
270 collapsed the data from males and females together. There was no significant preference for  
271 the Large or Narrow stimulus (Chi-square test:  $\chi = 0.108$ , df = 1,  $P = 0.74$ ), suggesting that the  
272 possibility to hide inside the Large hollow stimuli is not the main drive of the preference for  
273 hollow stimuli.

274 **Narrow preference.** Considering the Narrow preference index we did not observe any  
275 significant Sex difference (Kruskal-Wallis test:  $H = 0.11$ , df = 1,  $P = 0.74$ ). Overall we observed  
276 no significant preference for Large or narrow stimuli (Mann-Whitney test:  $V = 1583.5$ , df = 1,  $P$   
277 = 0.56).

278

#### 279 **Experiment 5a: naïve chicks tested with filled White vs. filled Black stimuli.**

280 **First choice.** The number of chicks that approached the White vs. Black stimulus was not  
281 significantly different between Sexes (Chi-squared test:  $\chi = 0.12$ , df = 1,  $P = 0.73$ ), therefore we

282 collapsed the data from males and females together. We observed a significant preference for  
283 the Black stimulus (Chi-squared test:  $\chi = 16.33$ ,  $df = 1$ ,  $P < 0.001$ ), see Figure 5A.

284 **Black preference.** Considering the Black preference index, we did not observe any significant  
285 Sex difference (Kruskal-Wallis test:  $H = 0.066$ ,  $df = 1$ ,  $P = 0.80$ ). Overall we observed a  
286 significant preference for the Black stimulus (Mann-Whitney test:  $V = 354$ ,  $df = 1$ ,  $P < 0.001$ ),  
287 see Figure 5B.

288

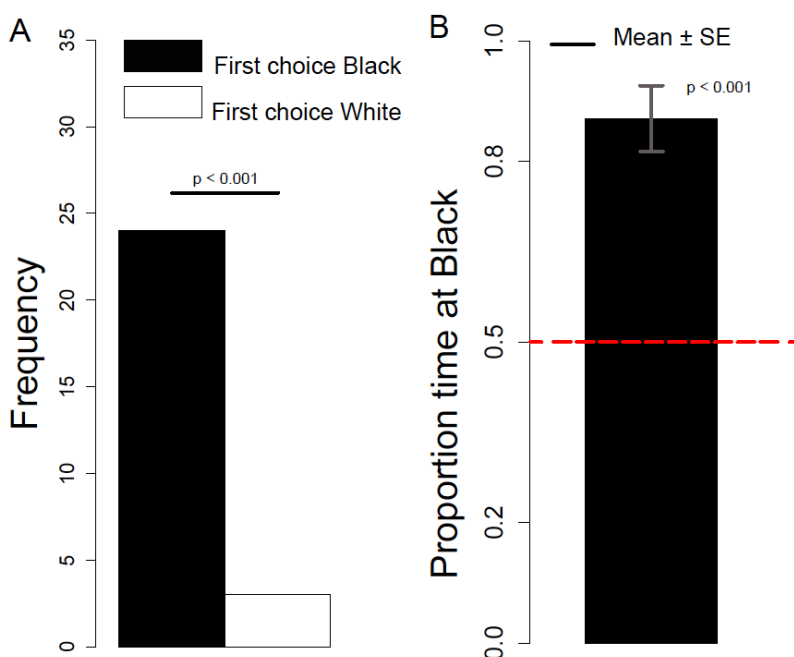

289

290 Figure 5. **A.** Number of chicks that first approached the Black or White stimulus. **B.** Proportion of time spent at  
291 the Black stimulus.

292

### 293 **Experiment 5b: naïve chicks tested with filled Black vs. Hollow stimuli.**

294 **First choice.** The number of chicks that approached the Hollow vs. Black stimulus was not  
295 significantly different between Sexes (Chi-squared test:  $\chi = 0.307$ ,  $df = 1$ ,  $P = 0.58$ ), therefore  
296 we collapsed the data from males and females together. We observed a significant preference  
297 for the Black stimulus (Chi-squared test:  $\chi = 14.4$ ,  $df = 1$ ,  $P < 0.001$ ), see Figure 6A.

298 **Black preference.** Considering the Black preference index we did not observe any significant  
299 Sex difference (Chi-squared test:  $\chi = 0.818$ ,  $df = 1$ ,  $P = 0.366$ ). Overall we observed a  
300 significant preference for the Black stimulus (Mann-Whitney test:  $V = 174$ ,  $P < 0.001$ ), see  
301 Figure 6B.

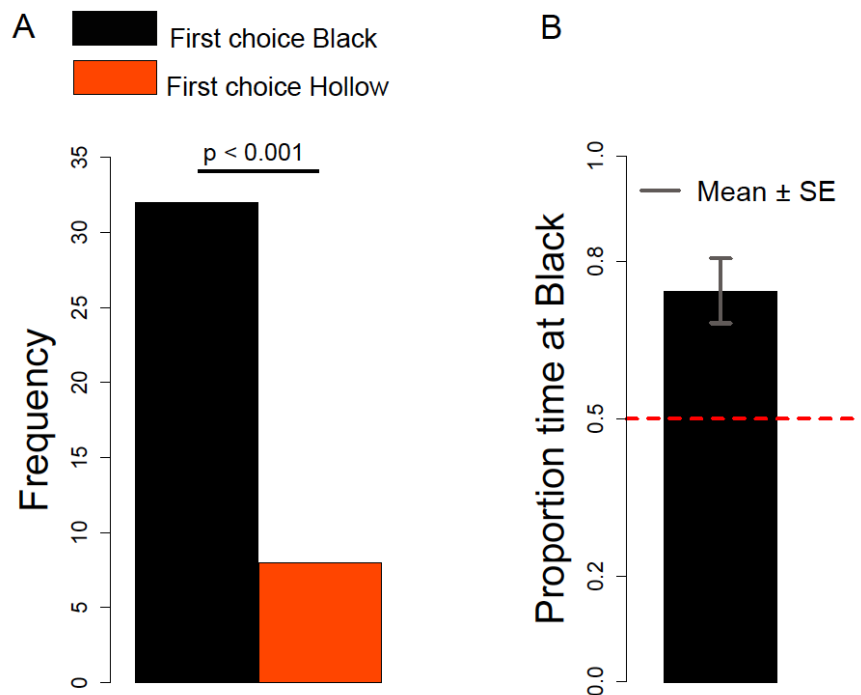

302  
303 Figure 6. A. Number of chicks that first approached the Black or Hollow stimulus. B. Proportion of time spent at  
304 the Black stimulus.

305  
306 **Experiment 6: naïve chicks tested with a White disk on a black background vs. a Black**  
307 **disk on a white background.**

308 **First choice.** The number of chicks that approached the White vs. Black disk was not  
309 significantly different between Sexes (Chi-squared test:  $\chi = 0.166$ ,  $df = 1$ ,  $P = 0.68$ ). Overall we  
310 observed a significant preference for the Black stimulus (Chi-squared test:  $\chi = 19.882$ ,  $df = 1$ ,  $P$   
311  $< 0.001$ ), see Figure 7A.

312 **Black preference.** Considering the Black preference index we did not observe any significant  
313 Sex difference (Kruskal-Wallis  $\chi^2 = 0.65$ ,  $df = 1$ ,  $P = 0.42$ ). Overall we observed a significant

314 preference for the Black stimulus (Mann-Whitney test:  $V = 519$ ,  $df = 1$ ,  $P < 0.001$ ), see Figure  
315 7B.

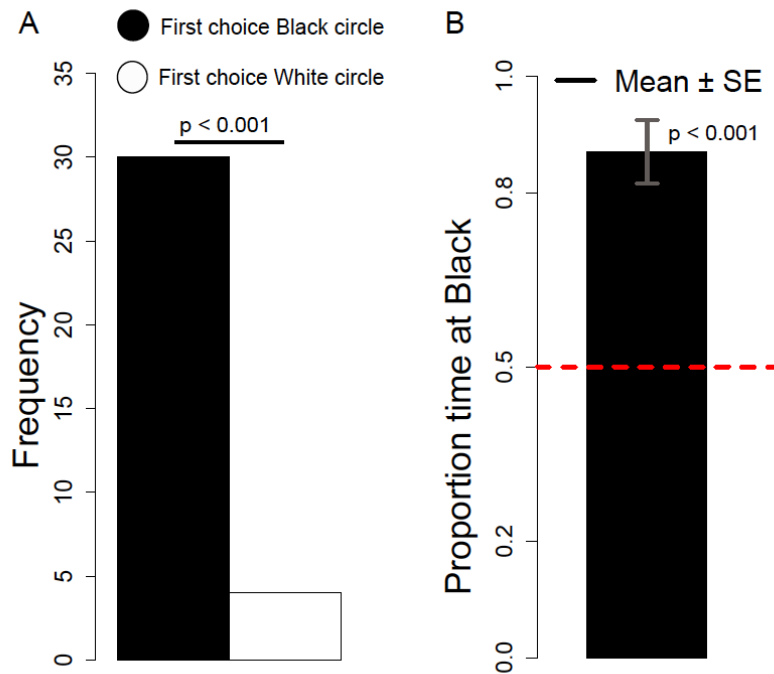

316

317 Figure 7. **A.** Number of chicks that first approached the Black disk on a white background or the White disk on a  
318 black background. **B.** Proportion of time spent at the Black disk on a white background.

319

## 320 Discussion

321 Sensory and cognitive predispositions can help naïve individuals in deciding whether to  
322 approach or avoid novel objects [3]. Chicks of the domestic fowl, which belong to a precocial  
323 social species, appear to be endowed with predispositions to approach animate objects [2,22],  
324 given that in the absence of previous experience, young individuals prefer to approach face-  
325 like configurations [10], self-propelled objects [12], speed changes [30] and biologically-  
326 moving objects [11]. For young chicks, approaching choices are particularly important as they  
327 can influence imprinting. Filial imprinting is a process through which young chicks develop a  
328 strong social attachment, including following responses, to the first conspicuous objects they  
329 encounter in their life (for general reviews on chick's development and imprinting see Rogers



330 [31], Bolhuis [32] and McCabe [26]). Although chicks can imprint on a variety of objects –  
331 including both natural and artificial objects –, specific colours, shapes, size and motion types  
332 induce stronger imprinting (see Introduction). Chicks' predispositions produce a bias in  
333 favour of naturalistic objects compared to artificial objects, as shown by the fact that once  
334 imprinted on a naturalistic object chicks cannot reverse their preference for an artificial  
335 object [33,34] or have a delayed reversal [35], although the opposite seems to be easier.  
336 Little is known though on the spontaneous preferences of chicks for approaching hollow or  
337 filled objects. This property can be particularly relevant to orient filial responses, because the  
338 presence of innards is associated with animate objects [23], that in the wild include social  
339 partners. Moreover, it has been observed that preschool children can reason about inside and  
340 outside features of objects [36], 14-month-old babies associate an object's behaviour more  
341 with internal than with external features [37], and preverbal infants (8-month-old) expect  
342 animate objects to possess insides [24]. In the case of human babies, spontaneous preferences  
343 in the absence of previous experience with hollow or filled objects can hardly be investigated.  
344 On the contrary, chicks are a convenient model as precocial and social species. We wondered  
345 whether the mere presence/absence of visible innards might trigger spontaneous approach  
346 preferences of young chicks for the first conspicuous objects encountered in their life, or  
347 whether experience might bias chicks preferences about the innards of social partners. To this  
348 aim we tested naïve and imprinted chicks using as hollow or filled objects orange cylinders of  
349 the size that can elicit filial responses.

350 In our experiments we consistently observed a preference of naïve chicks for approaching  
351 hollow objects. The same preference held for chicks that during imprinting had been exposed  
352 to objects occluded on their sides, that therefore were not explicitly filled or hollow. The  
353 preference for hollow objects decreased when chicks were imprinted for 24 hours on filled  
354 objects, suggesting that chicks are sensitive to this feature of the imprinting objects, and that

355 even a brief experience can modify preferences for hollow/filled objects. Yet, we did not  
356 observe an increase of the preference for hollow objects after imprinting on hollow objects,  
357 and difference in performance between chicks imprinted on hollow and filled objects was not  
358 strong. This suggests that, after imprinting takes place, the feature of being hollow or filled is  
359 not crucial to change the perceived familiarity of the stimuli. Chicks imprinted on occluded  
360 cylinders that discover at test for the first time the hollow/filled distinction for the imprinting  
361 object approach more hollow objects, similarly to what naïve chicks do. This suggests that  
362 hollow stimuli – instead of opaque cylinders that could hide something potentially more  
363 interesting than an empty cavity – are more attractive for both naïve and imprinted chicks.  
364 To establish which property of hollow objects was attractive for chicks we ran a series of  
365 subsequent experiments to investigate whether chicks were attracted by hollow objects as  
366 hiding cavities, and/or whether the brightness and contrast of hollow objects were attractive  
367 cues that triggered exploration. Although inexperienced chicks spontaneously recognize the  
368 properties of occluding objects, and search objects behind barriers that completely occlude  
369 them [38], in our experiments chicks did not prefer larger hollow objects, in which they could  
370 more easily hide, to smaller hollow objects. This suggests that the preference for hollow  
371 objects is not mainly driven by the possibility to hide into them. On the contrary, chicks were  
372 more attracted by darker insides or darker “caps”. The attractive feature of hollow objects  
373 could be either the darker part inside the object (its shadows, which are a depth cue), or the  
374 higher contrast introduced by the presence of shadows. If the contrast but not the lower  
375 brightness was attracting the chicks, we expected them to have no preference when facing a  
376 choice between two scenes with the same (but opposite) contrast: a white disk on a black  
377 background and a black disk on a white background. Instead, in this setting chicks strongly  
378 preferred the black disk on a white background, suggesting that lower brightness of an object  
379 but not the contrast per se is attractive for chicks.

380 To sum up, naïve chicks exhibited a consistent preference for hollow objects, which was  
381 mainly mediated by the lower brightness of the insides, probably perceived as a depth cue.  
382 This preference could be modified by imprinting experience, by mere exposure of chicks to a  
383 filled object for 24 hours. At least for still objects such as the stimuli used in our experiments,  
384 the property of being “filled” does not make objects more attractive as imprinting objects for  
385 chicks of the domestic fowl. This suggests that cues possibly not connected to animacy might  
386 drive predisposed approach responses in chicks. Further experiments should clarify whether  
387 the preference for hollow vs. filled objects is modified introducing cues of animacy, such as the  
388 presence of movement or face configurations in the presented objects.

389

### 390 **Acknowledgements**

391 GV was funded by the ERC Advanced Grant ERC-2011-ADG\_20110406, Project No:  
392 295517, PREMESOR

393

### 394 **Author contributions**

395 Conceived and designed the experiments: EV, GV. Performed the experiments: JS, AMN, EV.  
396 Analyzed the data: EV, JS. Contributed materials/analysis tools: EV, JS. Drafted the  
397 manuscript: EV. Revised and approved the manuscript: EV, JS, AMN, GV.

398

### 399 **REFERENCES**

- 400 1. Vallortigara G. Core knowledge of object, number, and geometry: A comparative and  
401 neural approach. *Cogn Neuropsychol.* 2012;29: 213–236.  
402 doi:10.1080/02643294.2012.654772
- 403 2. Rosa Salva O, Mayer U, Vallortigara G. Roots of a social brain: Developmental models of  
404 emerging animacy-detection mechanisms. *Neurosci Biobehav Rev.* Elsevier Ltd;

- 405 2015;50: 150–168. doi:10.1016/j.neubiorev.2014.12.015
- 406 3. Versace E, Vallortigara G. Origins of knowledge: Insights from precocial species. *Front*  
407 *Behav Neurosci.* 2015;9: 338. doi:10.3389/fnbeh.2015.00338
- 408 4. Giurfa M, Nunez J, Chittka L, Menzel R. Colour preferences of flower-naive honeybees. *J*  
409 *Comp Physiol A.* 1995;177. doi:10.1007/BF00192415
- 410 5. Raine NE, Chittka L. The Adaptive Significance of Sensory Bias in a Foraging Context:  
411 Floral Colour Preferences in the Bumblebee *Bombus terrestris*. *PLoS One.* 2007;2: e556.  
412 doi:10.1371/journal.pone.0000556
- 413 6. Ham AD, Osorio D. Colour preferences and colour vision in poultry chicks. *Proc R Soc B*  
414 *Biol Sci.* 2007;274: 1941–8. doi:10.1098/rspb.2007.0538
- 415 7. Schaefer H, Hess H. Color Preferences in Imprinting Objects. *Z Tierpsychol.* 1951;16:  
416 161–172.
- 417 8. Schulman AH, Hale BE, Graves H. Visual stimulus characteristics for initial approach  
418 response in chicks (*Gallus domesticus*). *Anim Behav.* 1970;18: 461–466.
- 419 9. Fabricius E, Boyd H. Experiments on the following-reaction of ducklings. *Wildfowl Trust*  
420 *Annu Rep.* : 84–89.
- 421 10. Rosa-Salva O, Regolin L, Vallortigara G. Faces are special for newly hatched chicks:  
422 evidence for inborn domain-specific mechanisms underlying spontaneous preferences  
423 for face-like stimuli. *Dev Sci.* 2010;13: 565–77. doi:10.1111/j.1467-7687.2009.00914.x
- 424 11. Vallortigara G, Regolin L, Marconato F. Visually inexperienced chicks exhibit  
425 spontaneous preference for biological motion patterns. *PLoS Biol.* 2005;3: e208.  
426 doi:10.1371/journal.pbio.0030208
- 427 12. Mascalzoni E, Regolin L, Vallortigara G. Innate sensitivity for self-propelled causal  
428 agency in newly hatched chicks. *Proc Natl Acad Sci U S A.* 2010;107: 4483–5.  
429 doi:10.1073/pnas.0908792107

- 430 13. Versace E, Reisenberger J. Large-scale assessment of olfactory preferences and learning  
431 in *Drosophila melanogaster*: behavioural and genetic components. PeerJ. 2015;3: e1214.  
432 doi:10.7717/peerj.1214
- 433 14. Keeseey IW, Knaden M, Hansson BS. Olfactory Specialization in *Drosophila suzukii*  
434 Supports an Ecological Shift in Host Preference from Rotten to Fresh Fruit. J Chem Ecol.  
435 2015; doi:10.1007/s10886-015-0544-3
- 436 15. Knaden M, Strutz A, Ahsan J, Sachse S, Hansson BS. Spatial Representation of Odorant  
437 Valence in an Insect Brain. Cell Rep. 2012;1: 392–399.  
438 doi:10.1016/j.celrep.2012.03.002
- 439 16. Dekker T, Revadi S, Mansourian S, Ramasamy S, Lebreton S, Becher PG, et al. Loss of  
440 *Drosophila* pheromone reverses its role in sexual communication in *Drosophila suzukii*.  
441 Proc Biol Sci. 2015;282: 20143018. doi:10.1098/rspb.2014.3018
- 442 17. Vallortigara G. Aristotle and the chicken: Animacy and the origins of beliefs. In: Fasolo  
443 A, editor. The Theory of Evolution and its Impact. New York: Springer International  
444 Publishing; 2012. pp. 189–200.
- 445 18. Johnson MH, Horn G. Development of filial preferences in dark-reared chicks. Anim  
446 Behav. 1988;36: 675–683. doi:10.1016/S0003-3472(88)80150-7
- 447 19. Mayer U, Rosa-Salva O, Lorenzi E, Vallortigara G. Social predisposition dependent  
448 neuronal activity in the intermediate medial mesopallium of domestic chicks (*Gallus*  
449 *gallus domesticus*). Behav Brain Res. Elsevier B.V.; 2016;310: 93–102.  
450 doi:10.1016/j.bbr.2016.05.019
- 451 20. Versace E, Fracasso I, Baldan G, Dalle Zotte A, Vallortigara G. Newborn chicks show  
452 inherited variability in early social predispositions for hen-like stimuli. bioRxiv. 2016;  
453 1–25. doi:http://dx.doi.org/10.1101/071456.
- 454 21. Miura M, Matsushima T. Biological motion facilitates imprinting. Anim Behav.

- 455 2016;116: 171–180. doi:10.1016/j.anbehav.2016.03.025
- 456 22. Di Giorgio E, Loveland J, Mayer U, Rosa-Salva O, Versace E, Vallortigara G. Filial  
457 responses as predisposed and learned preferences: Early attachment in chicks and  
458 babies. Behav Brain Res. 2016;
- 459 23. Gelman R. First principles organize attention to and learning about relevant data:  
460 Number and the animate-inanimate distinction as examples. Cogn Sci. 1990;14: 79–106.  
461 doi:10.1016/0364-0213(90)90027-T
- 462 24. Setoh P, Wu D, Baillargeon R, Gelman R. Young infants have biological expectations  
463 about animals. Proc Natl Acad Sci U S A. 2013;110: 15937–42.  
464 doi:10.1073/pnas.1314075110
- 465 25. Horn G. Memory, imprinting, and the brain an inquiry into mechanisms. Oxford:  
466 Clarendon Press; 1985.
- 467 26. McCabe BJ. Imprinting. Wiley Interdiscip Rev Cogn Sci. 2013;4: 375–390.  
468 doi:10.1002/wcs.1231
- 469 27. Egorova O V, Anokhin K V. Experimental analysis of the processes of systems genesis:  
470 expression of the c-fos gene in the chick brain during treatments inducing the  
471 development of the species-specific results-of-action acceptor. Neurosci Behav Physiol.  
472 2003;33: 209–16.
- 473 28. Vallortigara G, Andrew RJ. Lateralization of response by chicks to change in a model  
474 partner. Anim Behav. 1991;41: 187–194.
- 475 29. Vallortigara G, Andrew RJ. Differential involvement of right and left hemisphere in  
476 individual recognition in the domestic chick. Behav Processes. 1994;33: 41–57.  
477 doi:10.1016/0376-6357(94)90059-0
- 478 30. Rosa-Salva O, Grassi M, Lorenzi E, Regolin L, Vallortigara G. Spontaneous preference for  
479 visual cues of animacy in naïve domestic chicks: the case of speed changes. Cognition.

- 480 31. Rogers LJ. The Development of Brain and Behaviour in the Chicken. Wallingford: CAD  
481 International; 1995.
- 482 32. Bolhuis JJ. Mechanisms of avian imprinting: a review. *Biol Rev.* 1991;66: 303–345.  
483 doi:10.1111/j.1469-185X.1991.tb01145.x
- 484 33. Bolhuis JJ, Trooster WJ. Reversibility revisited: stimulus-dependent stability of filial  
485 preference in the chick. *Anim Behav.* 1988;36: 668–674. doi:10.1016/S0003-  
486 3472(88)80149-0
- 487 34. Boakes R, Panter D. Secondary imprinting in the domestic chick blocked by previous  
488 exposure to a live hen. *Anim Behav.* 1985;33: 353–365. doi:10.1016/S0003-  
489 3472(85)80059-2
- 490 35. de Vos GJ, van Kampen HS. Effects of primary imprinting on the subsequent  
491 development of secondary filial attachments in the chick. *Behaviour.* 1993;3-4: 245–  
492 263. doi:10.1017/CBO9781107415324.004
- 493 36. Gelman SA, Wellman HM. Insides and essences: Early understandings of the non-  
494 obvious. *Cognition.* 1991;38: 213–244.
- 495 37. Newman GE, Herrmann P, Wynn K, Keil FC. Biases towards internal features in infants’  
496 reasoning about objects. *Cognition.* 2008;107: 420–32.  
497 doi:10.1016/j.cognition.2007.10.006
- 498 38. Chiandetti C, Vallortigara G. Intuitive physical reasoning about occluded objects by  
499 inexperienced chicks. *Proc R Soc B Biol Sci.* 2011;278: 2621–7.  
500 doi:10.1098/rspb.2010.2381  
501
